# Supplementary material for: B4GALT1 Is a New Candidate to Maintain the Stemness of Lung Cancer Stem Cells
Source: MDPI journal article supplement (doi:10.3390/jcm8111928), 2019-11-09
Supplement: s1 [file s1]

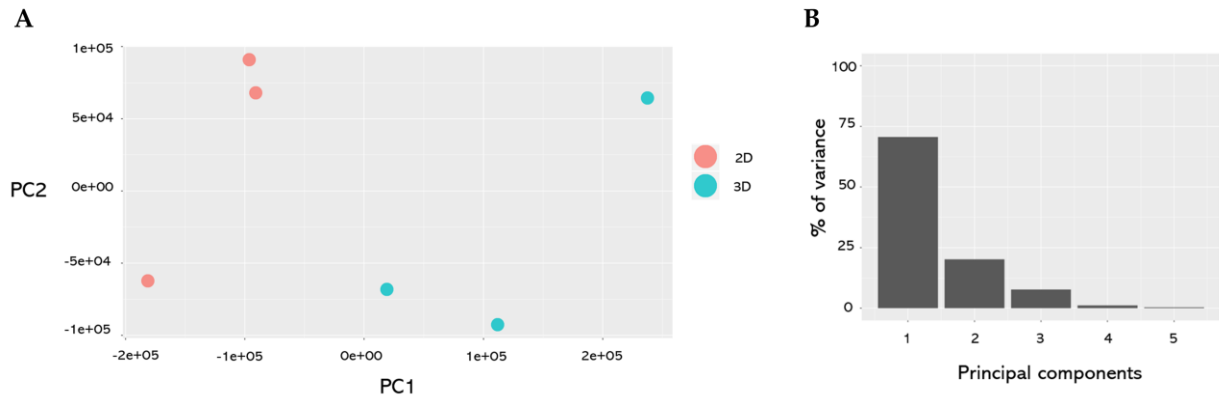

**Figure S1.** Quality Control of RNA-seq. **(A)** PCA analyses of RNA-seq profiled 2D and 3D cultures of NCI-H460 cell line (red = 2D; blue = 3D). **(B)** The fraction of variance explained by the principal components.

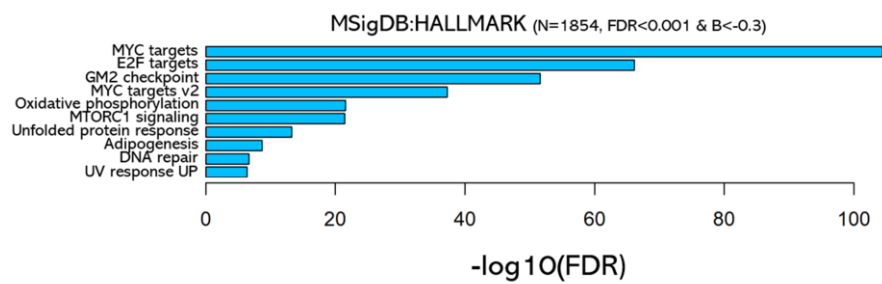

**Figure S2.** MSigDB: HALLMARK enrichment of the downregulated genes in 3D vs. 2D cultures.

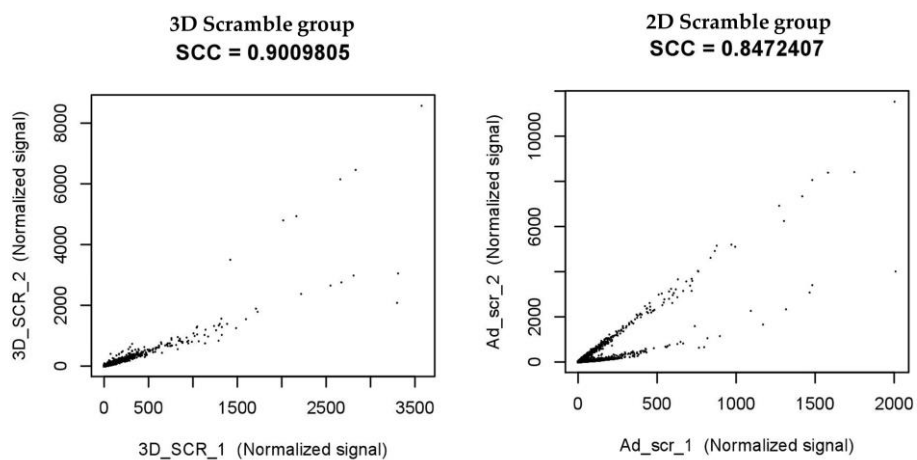

**Figure S3.** Quality Control of ATAC-seq. Spearman rank correlation of ATAC-seq duplicates. SCC = Spearman's rank correlation coefficient.

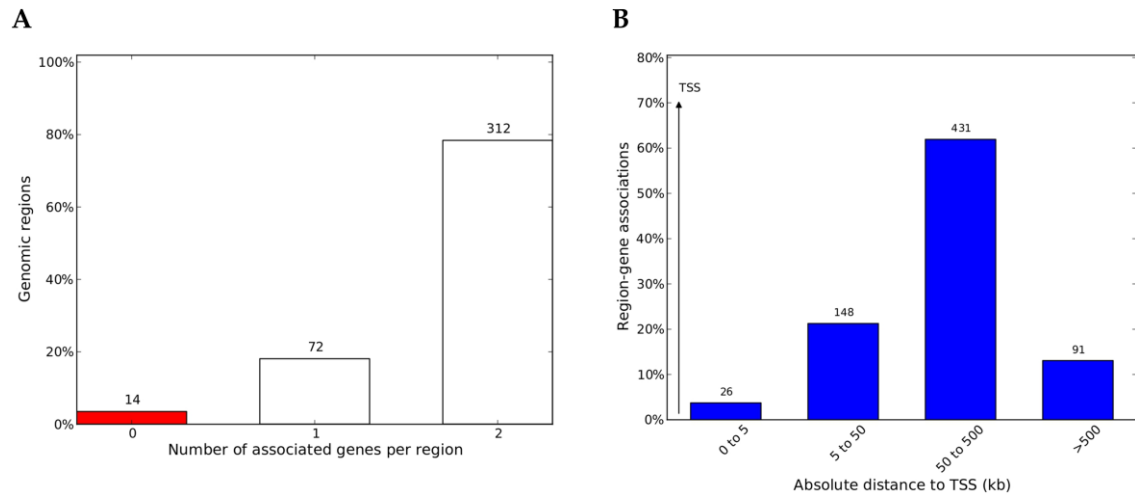

**Figure S4.** Differential significant ATAC-seq sites in relationship with the relative genomic neighbourhood. **(A)** The number of genes putatively associated by bps distance (within a window of 500kb) to each differential regulatory region. **(B)** The number of differential regulatory sites in the function of the absolute distance to the closest gene TSS.

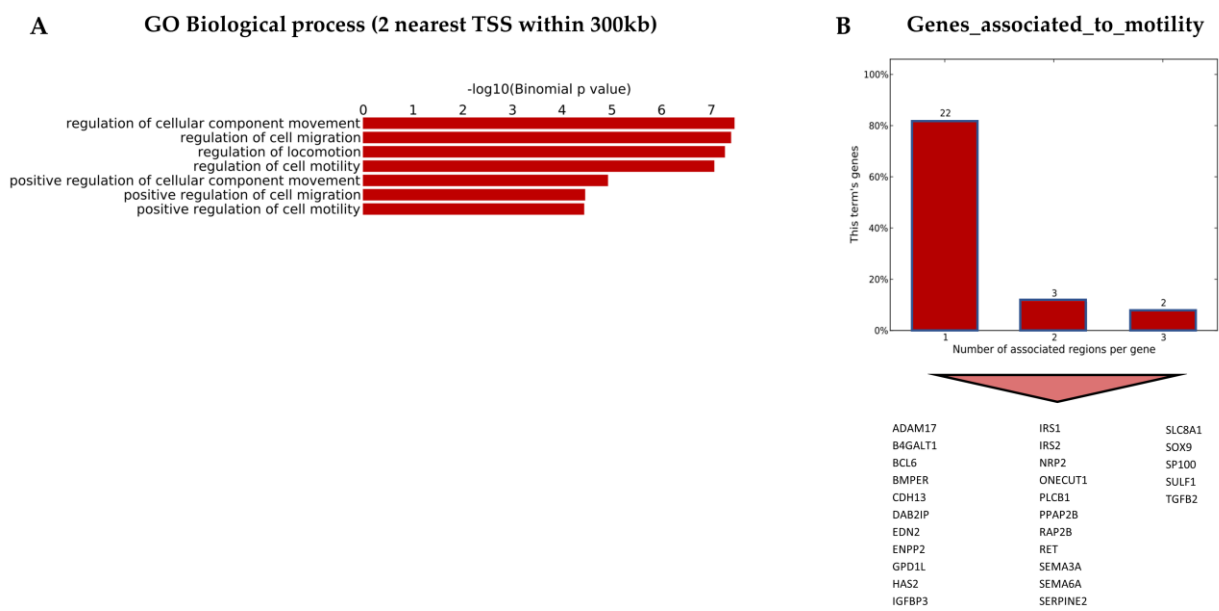

**Figure S5.** Enrichment analysis of top 100 up-regulated sites in 3D vs 2D ATAC-seq. **(A)** Gene Ontology Biological processes considering the two nearest TSS within a window of 300kb from the selected regulatory regions. **(B)** Barplot depicting the number of genes associated with “motility” to each regulatory region. Below the gene symbol of genes associated with motility.

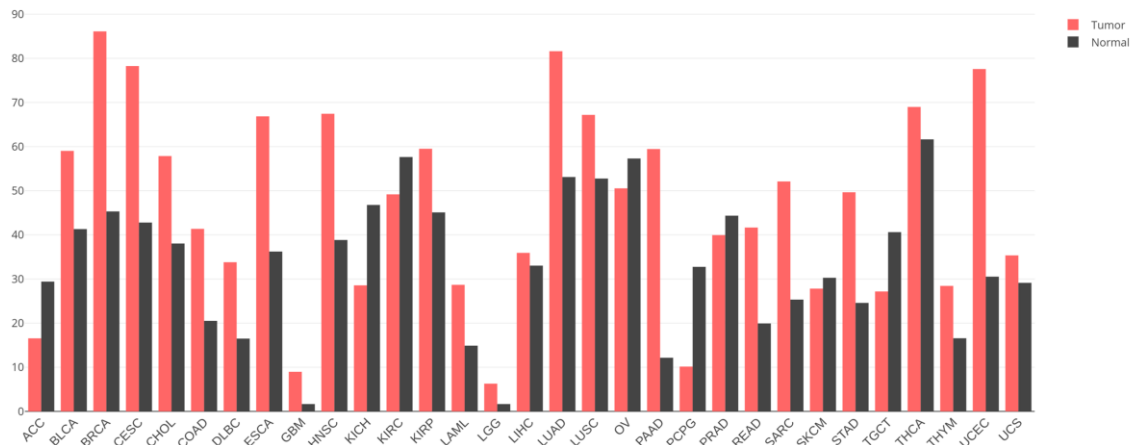

**Figure S6.** PanCancer analysis of B4GALT1 expression. The barchart represents the B4GALT1 expression in 31 cancer types and the relative normal (red = cancer; grey = normal). Abbreviations = ACC Adrenocortical carcinoma; BLCA Bladder Urothelial Carcinoma; BRCA Breast invasive carcinoma; CESC Cervical squamous cell carcinoma and endocervical adenocarcinoma; CHOL Cholangio carcinoma; COAD Colon adenocarcinoma; DLBC Lymphoid Neoplasm Diffuse Large B-cell Lymphoma; ESCA Esophageal carcinoma; GBM Glioblastoma multiforme; HNSC Head and Neck squamous cell carcinoma; KICH Kidney Chromophobe; KIRC Kidney renal clear cell carcinoma; KIRP Kidney renal papillary cell carcinoma; LAML Acute Myeloid Leukemia; LGG Brain Lower Grade Glioma; LIHC Liver hepatocellular carcinoma; LUAD Lung adenocarcinoma; LUSC Lung squamous cell carcinoma; MESO Mesothelioma; OV Ovarian serous cystadenocarcinoma; PAAD Pancreatic adenocarcinoma; PCPG Pheochromocytoma and Paraganglioma; PRAD Prostate adenocarcinoma; READ Rectum adenocarcinoma; SARC Sarcoma; SKCM Skin Cutaneous Melanoma; STAD Stomach adenocarcinoma; TGCT Testicular Germ Cell Tumors; THCA Thyroid carcinoma; THYM Thymoma; UCEC Uterine Corpus Endometrial Carcinoma; UCS Uterine Carcinosarcoma; UVM Uveal Melanoma.

MSigDB:HALLMARK (N=1241, FDR<0.001 & B> 0.3)

|                                          |                                                                                                                                     |
|------------------------------------------|-------------------------------------------------------------------------------------------------------------------------------------|
| <b>EPITHELIAL MESENCHYMAL TRANSITION</b> | FN1 SERPINE1 IGFBP3 TGFBI LAMC1 SPP1 TFPI2 SPOCK1<br>TIMP1 QSOX1 EDIL3 ECM1 HTRA1 VEGFC PLAUR GJA1 IGFBP4<br>LRP1 NT5E MMP1 TNFAIP3 |
| <b>TNFA SIGNALING VIA NFKB</b>           | TNFAIP3 PTGS2 CCL20 NFKB2 BIRC3 PLAUR SOD2 NR4A1<br>SERPINE1 TNFAIP6 KYNU G0S2 BTG1 KLF10<br>LAMB3 <b>B4GALT1</b> PDE4B DUSP4       |
| <b>HYPOXIA</b>                           | P4HA1 P4HA2 CCNG2 SERPINE1 DDIT4 IGFBP3 CITED2 ISG20<br>WSB1 STC1 BTG1 PLAUR PPP1R3C TNFAIP3 CP PAM TGFBI AKAP12                    |
| <b>COMPLEMENT</b>                        | SERPINE1 LGMN TIMP1 CTSB PLAUR DUSP6 FN1 LRP1 CTSD<br>PLAT CALM1 KYNU CD46 CD55 CP TNFAIP3 TFPI2                                    |
| <b>KRAS SIGNALING UP</b>                 | DUSP6 G0S2 BIRC3 TFPI TNFAIP3 IGFBP3 SPP1 TMEM100<br>PLAUR AKAP12 PLAT CCL20 PTGS2 ANKH VWA5A                                       |
| <b>GLYCOLYSIS</b>                        | P4HA1 IGFBP3 CITED2 QSOX1 SPAG4 P4HA2 <b>B4GALT1</b> DDIT4<br>GLCE STC1 ISG20 PAM NT5E TGFBI CTH                                    |
| <b>COAGULATION</b>                       | SERPINE1 MMP1 FURIN LGMN CTSB TIMP1 PLAT FN1 TFPI2<br>HTRA1 LRP1 DUSP6                                                              |
| <b>CHOLESTEROL HOMEOSTASIS</b>           | FDPS IDI1 ACSS2 TRIB3 LGMN ANTXR2 STARD4 PLAUR                                                                                      |
| <b>P53 PATHWAY</b>                       | ZMAT3 DDIT4 BTG1 TXNIP ITGB4 TRIB3 VWA5A CTSD GM2A<br>RPS12 APP                                                                     |
| <b>APOPTOSIS</b>                         | BIRC3 TIMP1 PLAT APP SOD2 CTH TXNIP ANKH ISG20                                                                                      |

**Table S1.** Upregulated genes in 3D vs. 2D associated with most significant MSigDB: HALLMARKs.
